# Supplementary material for: SGLT2 inhibitor dapagliflozin prevents atherosclerotic and cardiac complications in experimental type 1 diabetes
Source: PubMed Central journal article supplement (PMC8853531; doi:10.1371/journal.pone.0263285), 2022-02-17
Supplement: pone.0263285.s002.pdf [file pone.0263285.s002.pdf]

**S2 Table. Mean arterial pressure, heart rate and heart to body weight ratio.**

|                                | <b>Control</b> | <b>C+DAPA</b> |
|--------------------------------|----------------|---------------|
| Mean arterial pressure (mmHg)  | 88.5±3.66      | 86.2±3.44     |
| Heart rate (bpm)               | 444±12.9       | 399±24.2      |
| Heart to body weight ratio (%) | 0.29±0.01      | 0.31±0.05     |

Mean arterial pressure, heart rate and heart to body weight ratio of control, dapagliflozin-treated control (C+DAPA) rats. Values are presented as means±SDs and data were analyzed by one-way ANOVA with Holm-Sidak multiple comparisons test or Kruskal-Wallis with Dunn comparison test (n = 6/group).
